# Supplementary material for: 3D printing of polyvinyl alcohol hydrogels enabled by aqueous two-phase system
Source: Royal Society of Chemistry journal article supplement (doi:10.1039/d3mh01714a), 2024-01-01
Supplement: d3mh01714a1.pdf [file d3mh01714a1.pdf]

## Supporting Information

### 3D Printing of Polyvinyl Alcohol Hydrogels Enabled by Aqueous Two-Phase System

Rahul Karyappa<sup>1,3</sup>, Nidhi Nagaraju<sup>1,2</sup>, Kento Yamagishi<sup>1</sup>, Xue Qi Koh<sup>3</sup>, Qiang Zhu<sup>3,4,5</sup> and Michinao Hashimoto<sup>1,2\*</sup>

<sup>1</sup>Digital Manufacturing and Design Centre, Singapore University of Technology and Design, 8, Somapah Road, Singapore 487372, Republic of Singapore

<sup>2</sup>Pillar of Engineering Product Development, Singapore University of Technology and Design, 8, Somapah Road, Singapore 487372, Republic of Singapore

<sup>3</sup>Institute of Materials Research and Engineering (IMRE), Agency for Science, Technology and Research (A\*STAR), 2 Fusionopolis Way, Singapore 138634, Republic of Singapore

<sup>4</sup>School of Chemistry, Chemical Engineering and Biotechnology, Nanyang Technological University, 21 Nanyang Link, Singapore 637371, Republic of Singapore

<sup>5</sup>Institute of Sustainability for Chemicals, Energy and Environment (ISCE<sup>2</sup>), Agency for Science, Technology and Research (A\*STAR), 1 Pesek Road, Jurong Island, Singapore, 627833, Republic of Singapore

\*Electronic mail: hashimoto@sutd.edu.sg

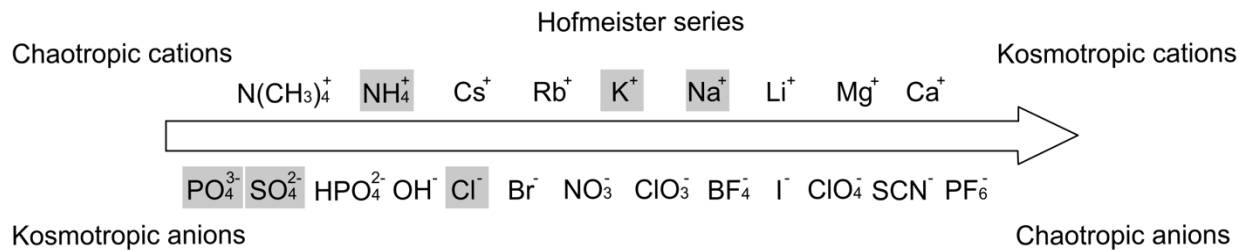

**Figure S1.** A Hofmeister series showing both anions and cations of growing size. The series provides a qualitative ranking of the ions according to their ability to solubilize (salting in) or precipitate (salting out) proteins in solutions. Kosmotropes are to make water structures, which enhance the hydrophobic interactions and exclude the hydrophobic substances from the aqueous solutions. In contrast, chaotropes are to break water structures, which increase the solubility of hydrophobic substances in water. The salts  $Na_2SO_4$ ,  $(NH_4)_2SO_4$ ,  $K_3PO_4$ , and  $NaCl$  are selected to understand their effects on the salting out of PVA in this study.

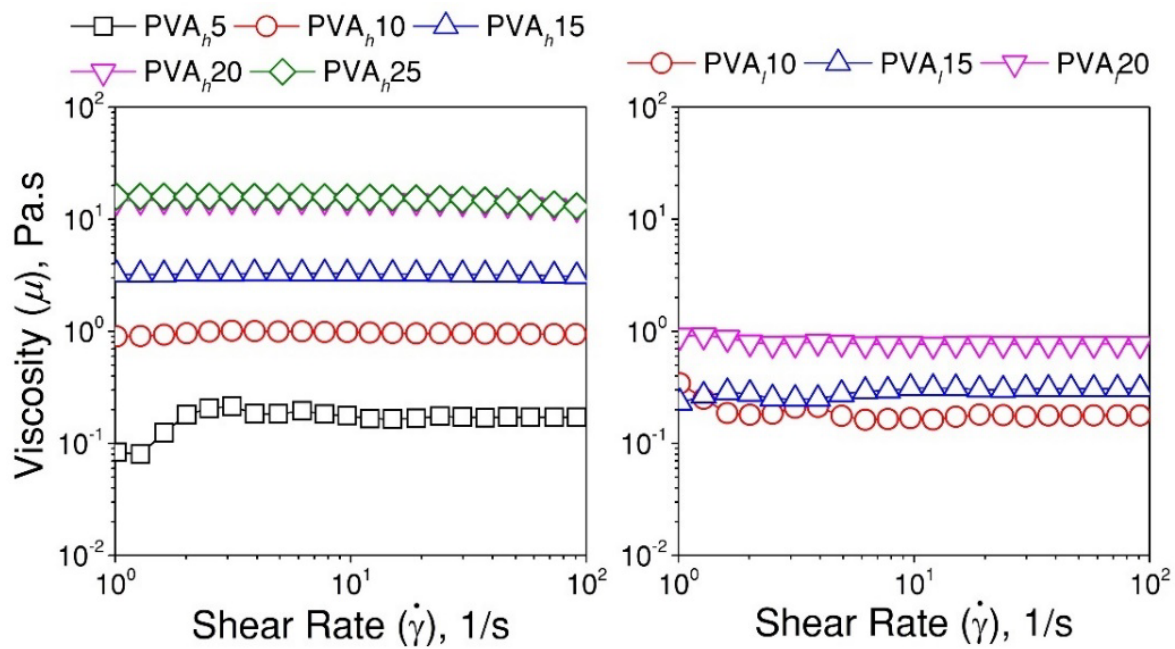

**Figure S2.** Rheological characterization of PVA inks. Plots showing viscosity ( $\mu$ ) as a function of applied shear rate ( $\dot{\gamma}$ ) for high MW PVA (5 – 25% w/w) and low MW PVA (10 – 20% w/w).

Volume of PVA<sub>h</sub>(25) - 2 mL

Na<sub>2</sub>SO<sub>4</sub> (% w/w)

2 4 6 8

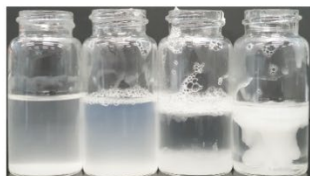

○ ○ ○ ○

K<sub>3</sub>PO<sub>4</sub> (% w/w)

2 4 6 8

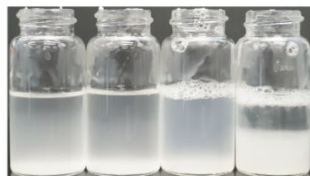

○ ○ ○ ○

(NH<sub>4</sub>)<sub>2</sub>SO<sub>4</sub> (% w/w)

2 4 6 8

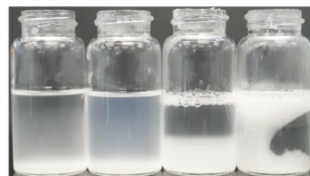

○ ○ ○ ○

○ Soluble/delayed salting-out ○ *In situ* salting-out

**Figure S3.** Optical images showing the effect of concentration of Na<sub>2</sub>SO<sub>4</sub>, K<sub>3</sub>PO<sub>4</sub> and (NH<sub>4</sub>)<sub>2</sub>SO<sub>4</sub> on *in situ* precipitation of PVA<sub>h</sub>(25) solution.

PVA<sub>h</sub>(25)-S/ Na<sub>2</sub>SO<sub>4</sub>(12)

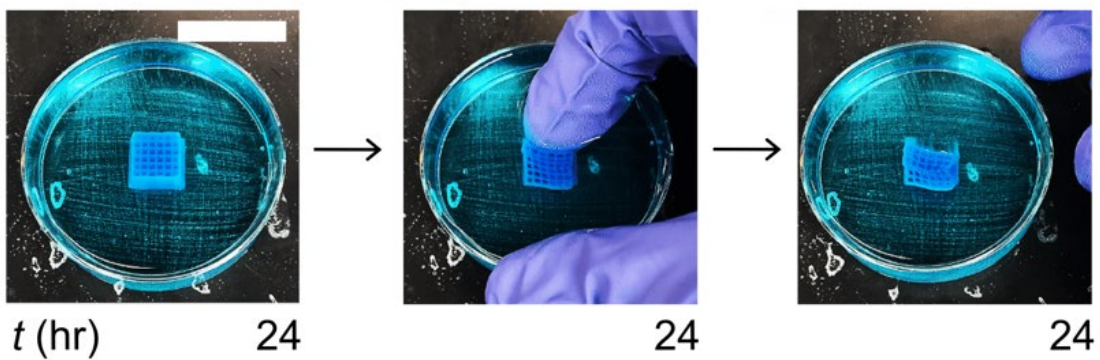

**Figure S4.** Photographs showing plastic deformations of the printed object of PVA<sub>h</sub>(25)-S in Na<sub>2</sub>SO<sub>4</sub>(12) while detaching from the substrate. Scale bar = 1 cm.

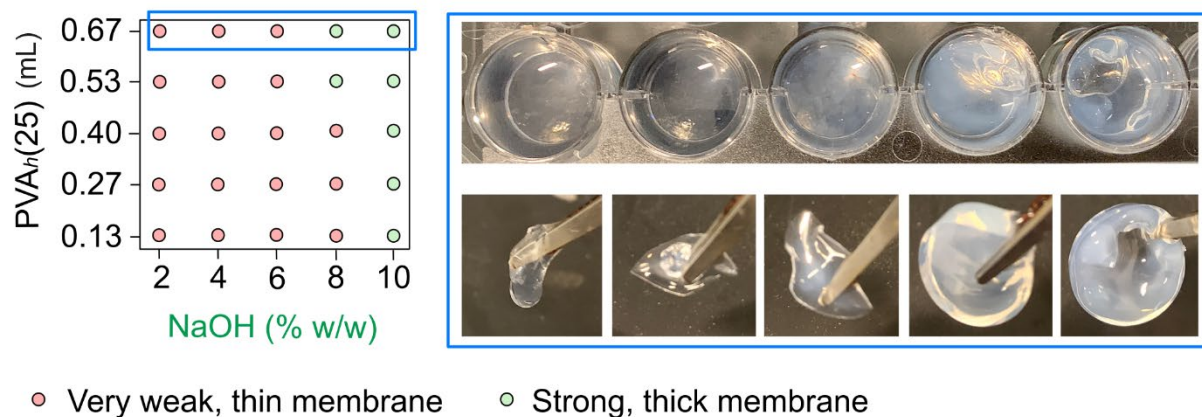

**Figure S5.** Effect of concentration of NaOH on gelation or physical crosslinking of PVA solutions.

PVA<sub>h</sub>(25)-A/NaOH(20)

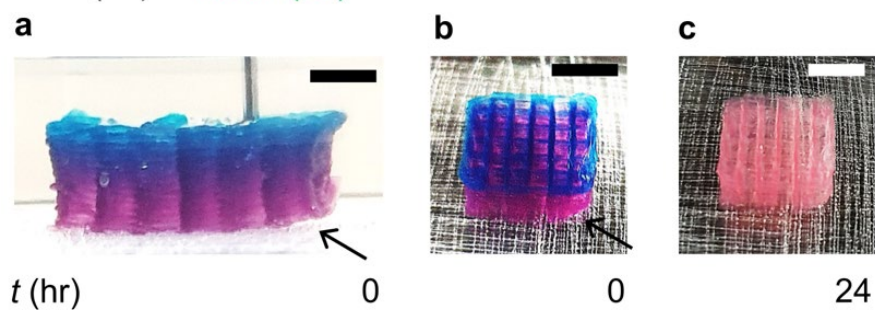

**Figure S6.** Warping and detachment of the printed object from the substrate: **(a)** during printing and **(b)** after printing. These deformations occurred during printing due to the fast crosslinking of PVA<sub>h</sub> chains at high concentrations of NaOH in the embedding media (NaOH(20)). The black arrows show the detachment of the printed object from the substrate. The color of the dye mixed with PVA<sub>h</sub> ink changed from blue to violet while printing, possibly due to the reaction of the dye with NaOH. The gradual color change was indicative of the progress of the physical crosslinking of PVA<sub>h</sub>. **(c)** Optical image of the 3D printed object showing the change in the color to light violet after 24 hr of printing. Scale bars = **(a)** 2 mm, and **(b-c)** 5 mm.

**a** Sagging and spreading of PVA<sub>h</sub>(20)-S/Na<sub>2</sub>SO<sub>4</sub>(8) after the completion of printing

Post-printing contact time,  $T_c$

(Opaque image in the background is for  $T_c = 0$ , immediately after printing)

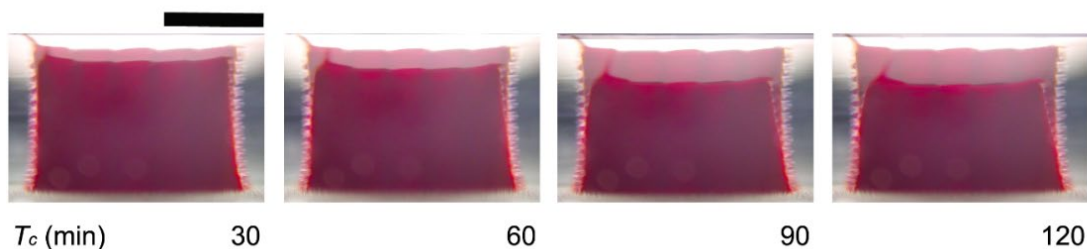

**b** Effect of  $T_c$  on the behaviour of the printed objects after dialysis (swelling/no swelling)

PVA<sub>h</sub>(20)-Hy/Na<sub>2</sub>SO<sub>4</sub>(8)/NaOH(1) → ①  $T_c = 10$  min, ②  $T_c = 30$  min, ③  $T_c = 24$  hr

PVA<sub>h</sub>(20)-Hy/Na<sub>2</sub>SO<sub>4</sub>(8)/NaOH(4) → ④  $T_c = 10$  min, ⑤  $T_c = 30$  min, ⑥  $T_c = 24$  hr

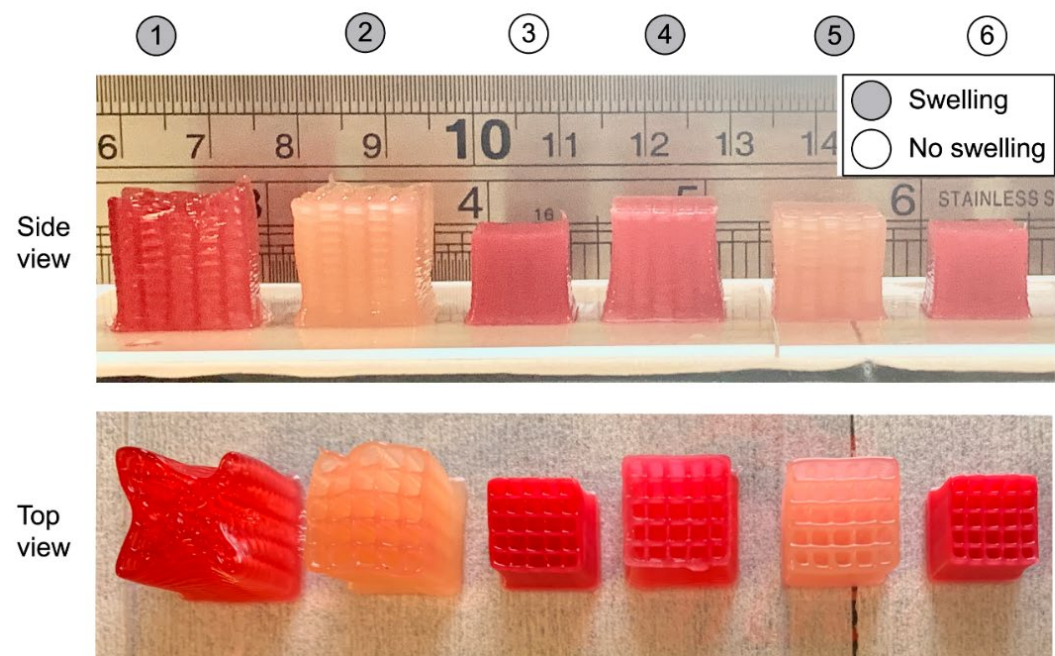

**Figure S7.** A proposed mechanism of formation of PVA-Hy when PVA ink was printed in an embedding media containing both salt and alkali. **(a)** Optical images showing spreading and sagging of PVA<sub>h</sub>(20)-S after printing in Na<sub>2</sub>SO<sub>4</sub>(8) with the increase in post-printing contact time ( $T_c$ ). **(b)** Optical images of printed objects of PVA<sub>h</sub>(20)-Hy showing the effect of  $T_c$  on printed structures when the ink was printed in embedding media containing Na<sub>2</sub>SO<sub>4</sub>(8)/NaOH(1) and Na<sub>2</sub>SO<sub>4</sub>(8)/NaOH(4). Scale bar = **(a)** 5 mm.



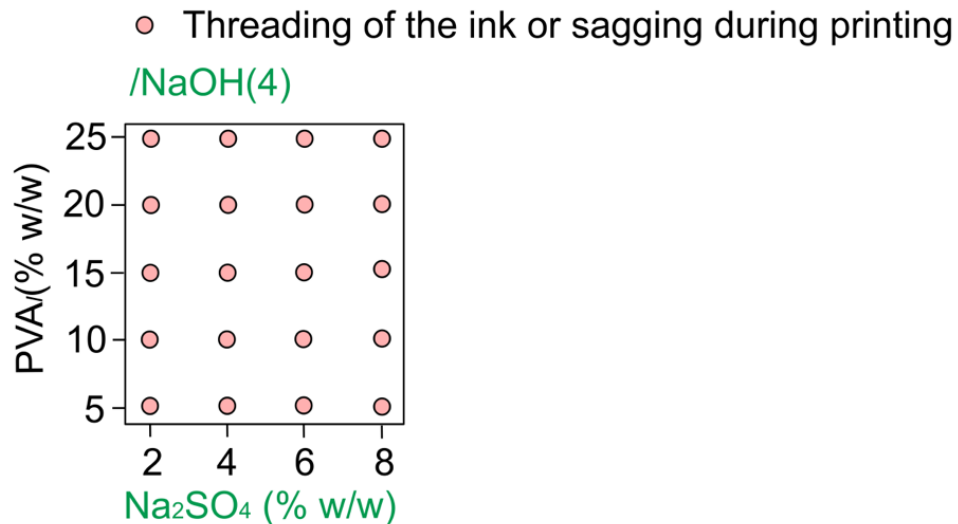

**Figure S8.** A plot showing fidelity of printing of PVA inks prepared with different concentrations of PVA<sub>1</sub> when printed in NaOH(4) with varying concentrations of Na<sub>2</sub>SO<sub>4</sub> (2 – 8% w/w). Inks prepared with PVA<sub>1</sub> were not suitable for DIW 3D printing. Threading of the ink due to the attachment of the ink to the nozzle tip or spreading of the ink was observed during printing. The threading of the inks was mainly due to the low viscosity of PVA<sub>1</sub> inks.

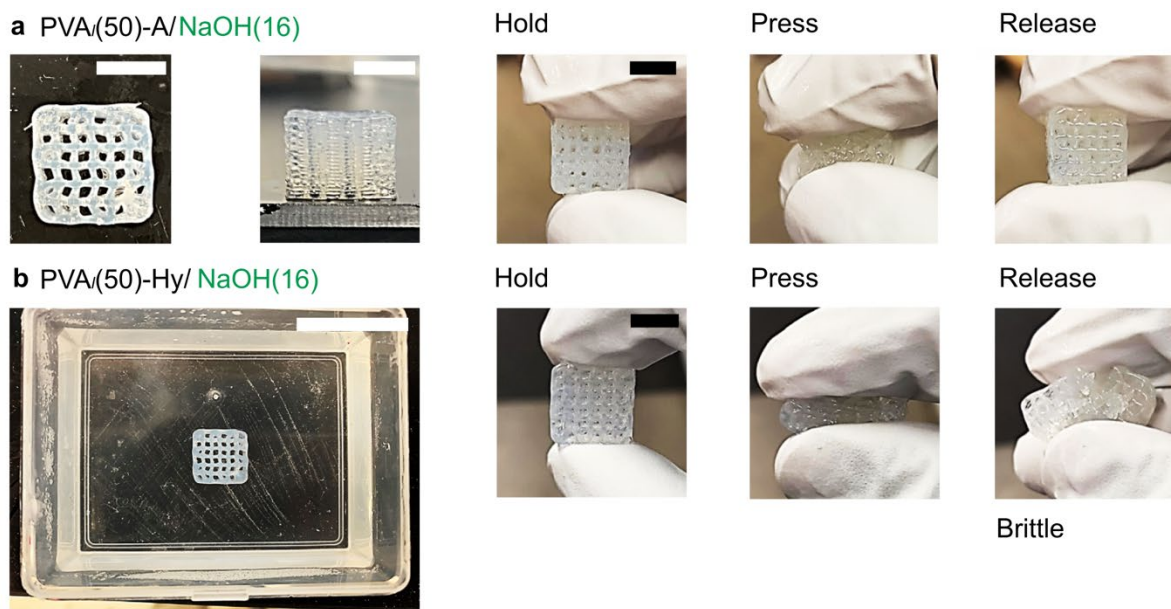

**Figure S9.** (a) Optical images showing top and side view of the 3D printed PVA<sub>l</sub>(50)-A in NaOH(16), and its elastic and flexible nature. (b) Optical image showing washing of 3D printed PVA<sub>l</sub>(50)-A in DI water to remove Na<sup>+</sup> ions and its degradation after removing the Na<sup>+</sup> ions. The printed object collapsed into pieces when compressed. Scale bar = (a) 1 cm, and (b) 2 cm (white) and 1 cm (black).

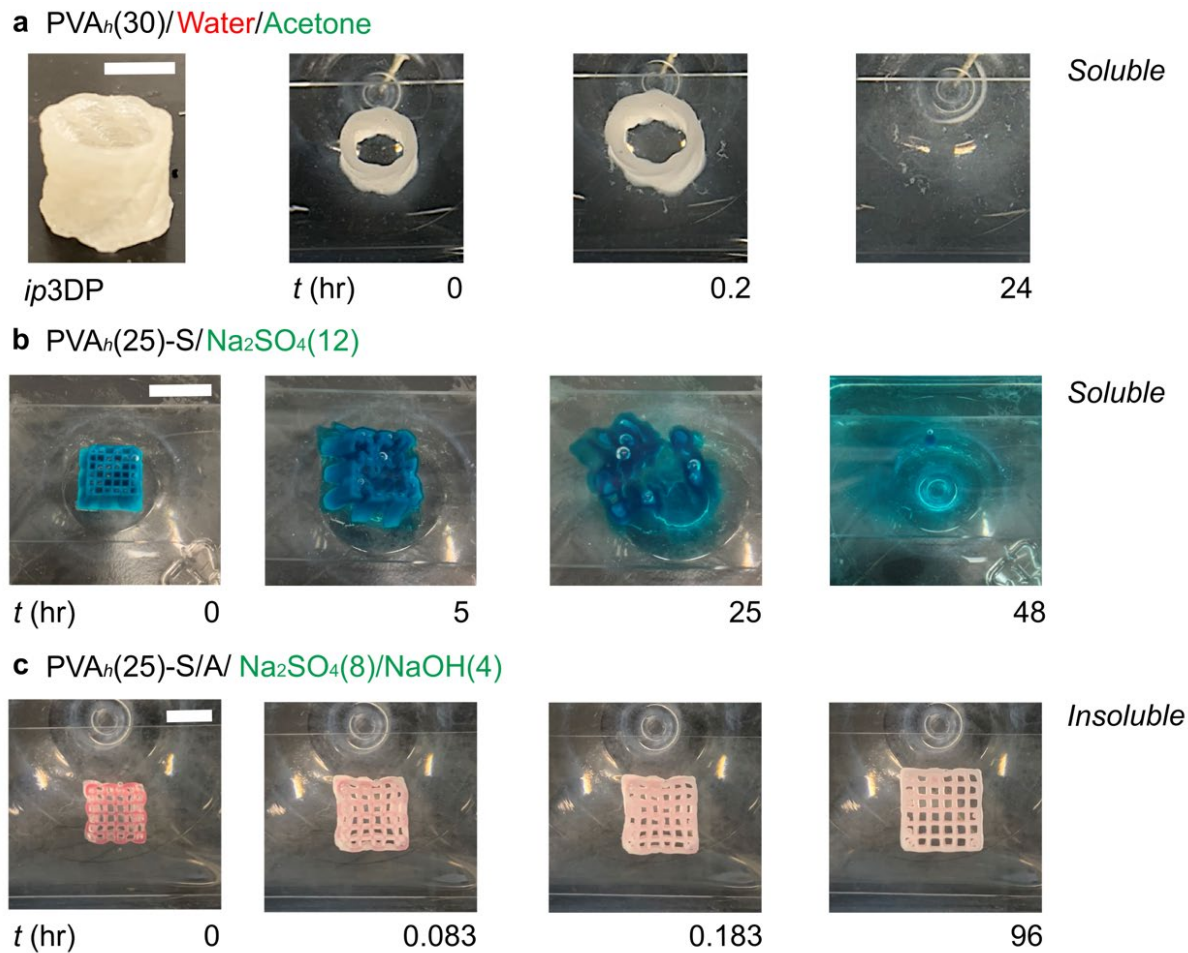

**Figure S10.** Optical images showing the dissolution of the 3D printed objects: (a) PVA<sub>h</sub>(30), (b) PVA<sub>h</sub>(25)-S and (c) PVA<sub>h</sub>(25)-S/A in DI water. PVA<sub>h</sub>(30): PVA<sub>h</sub> dissolved in water and printed in acetone by *ip3DP*. PVA<sub>h</sub>(25)-S: PVA<sub>h</sub> dissolved in water and printed in Na<sub>2</sub>SO<sub>4</sub>(12). PVA<sub>h</sub>(25)-S/Na: PVA<sub>h</sub> dissolved in water and printed in Na<sub>2</sub>SO<sub>4</sub>(8)/NaOH(4). Scale bars = 5 mm.

**a** Dried PVA<sub>h</sub>(25)-Hy in DI water

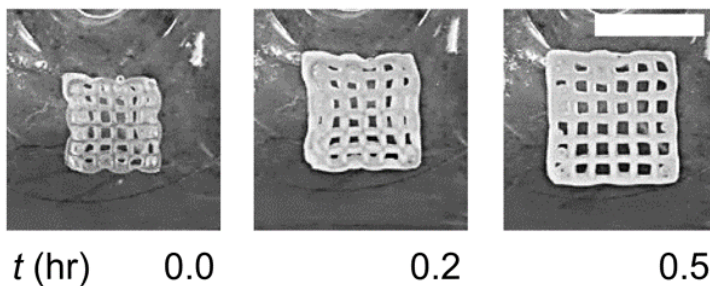

**b** Swollen PVA<sub>h</sub>(25)-Hy in air

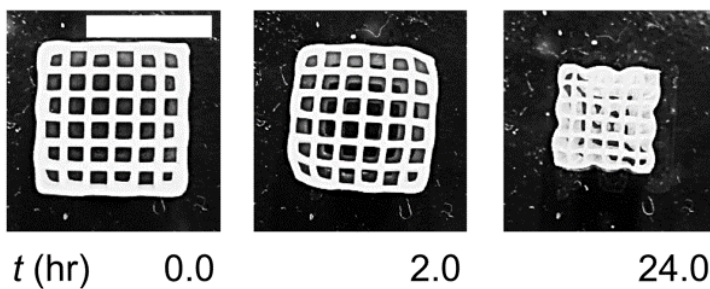

**Figure S11.** Optical images showing (a) swelling of the dried PVA<sub>h</sub>-Hy in DI water at room temperature and (b) drying of the swelled PVA<sub>h</sub>-Hy in air at room temperature. Scale bars = 1 cm.

PVA<sub>h</sub>(20)-Hy/Na<sub>2</sub>SO<sub>4</sub>(8)/NaOH(1) → ① T = 10 min, ② T = 30 min, ③ T = 24 hr

PVA<sub>h</sub>(20)-Hy/Na<sub>2</sub>SO<sub>4</sub>(8)/NaOH(4) → ④ T = 10 min, ⑤ T = 30 min, ⑥ T = 24 hr

a 3D-printed objects of PVA<sub>h</sub>(20)-Hy

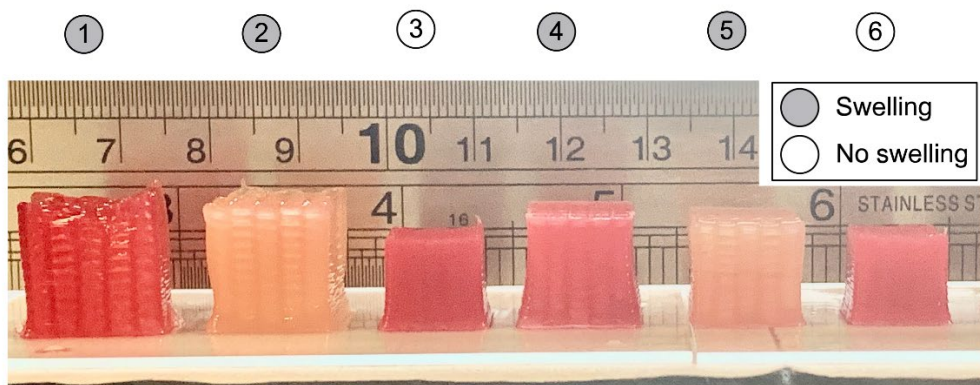

b drying at room temperature for 5 days ↓

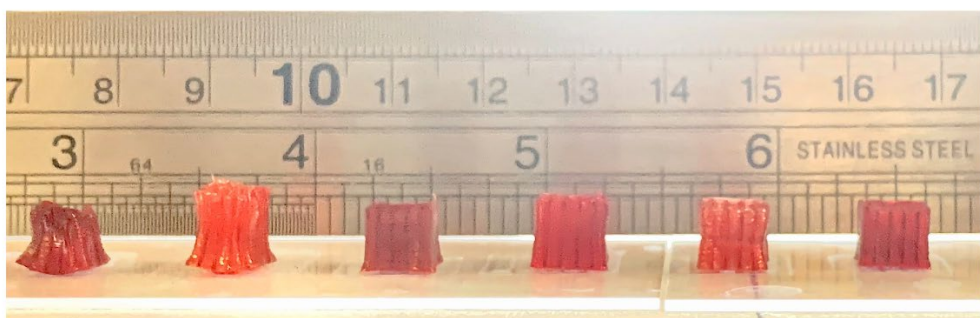

Volume Shrinkage (%)

~80.5

~75.3

**Figure S12.** The volume shrinkage (%) of PVA<sub>h</sub>(20)-Hy observed after drying at room temperature for five days.

PVA<sub>h</sub>(25)-Hy/ Na<sub>2</sub>SO<sub>4</sub>(8)/NaOH(4)

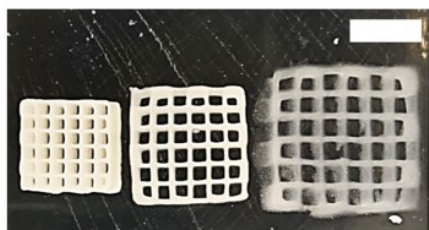

$T$  (°C)    60        70        80

**Figure S13.** Thermal stability of the printed PVA<sub>h</sub>(25)-Hy when immersed in water at 60 °C, 70 °C and 80 °C for 2 h. PVA<sub>h</sub>(25)-Hy was stable below 70 °C, and no swelling was observed. PVA<sub>h</sub>(25)-Hy dissolved entirely above 90 °C. Scale bar = 1 cm.

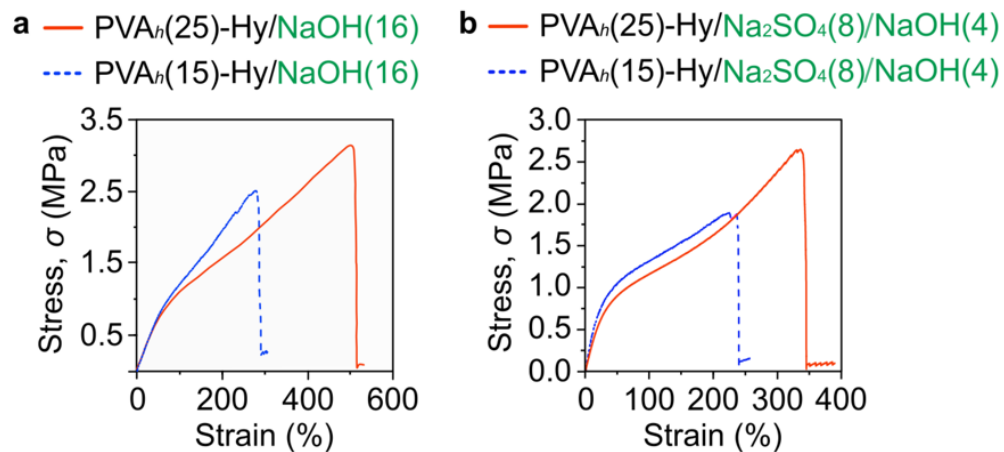

**Figure S14.** Stress-strain curves of PVA<sub>h</sub>(25)-Hy and PVA<sub>h</sub>(15)-Hy fabricated with NaOH(16) and Na<sub>2</sub>SO<sub>4</sub>(8)/NaOH(4), respectively.
